# Supplementary material for: Selecting the most important self-assessed features for predicting conversion to mild cognitive impairment with random forest and permutation-based methods
Source: PubMed Central journal article supplement (PMC7692490; doi:10.1038/s41598-020-77296-4), 2020-11-26
Supplement: 41598_2020_77296_MOESM1_ESM.pdf [file 41598_2020_77296_MOESM1_ESM.pdf]

## Supplementary Material

Selecting the most important self-assessed features for predicting conversion to Mild Cognitive Impairment with Random Forest and Permutation-based methods

Jaime Gómez-Ramírez, Marina Ávila-Villanueva, Miguel Ángel Fernández-Blázquez

### Self-assessed features

**Table S1.** Self-assessed features collected in *The Vallecas Project*

| Type              | Name                                   | Description                                         |
|-------------------|----------------------------------------|-----------------------------------------------------|
| Demographics      | age                                    | age $\mathbb{Z}_{\geq 0}$                           |
|                   | income                                 | average income by zip code $\mathbb{R}_{>0}$        |
|                   | sex                                    | male or female                                      |
|                   | educational level                      | [None (0), primary(1), secondary(2), university(3)] |
|                   | years of schooling                     | $\mathbb{Z}_{\geq 0}$                               |
|                   | marital status                         | single, married, widow, divorced                    |
|                   | sons and daughters                     | $\mathbb{Z}_{\geq 0}$                               |
|                   | population residence                   | $\mathbb{Z}_{\geq 0}$                               |
|                   | an employee                            | [0,1]                                               |
|                   | socio-econ.status                      | $\mathbb{Z}_{\geq 0 \leq 10}$                       |
| years an employee | $\mathbb{Z}_{\geq 0}$                  |                                                     |
| Anthropometric    | lat-manual                             | right,left handed [0,1,2]                           |
|                   | pabd                                   | perimeter of the abdomen $\mathbb{R}_{>0cm}$        |
|                   | weight                                 | weight year 1 $\mathbb{R}_{>0kg}$                   |
|                   | height                                 | height year 1 $\mathbb{R}_{>0m}$                    |
|                   | audi                                   | auditory deficit [0,1]                              |
|                   | visual                                 | Visual deficit [0,1]                                |
| Neuropsychiatric  | bmi                                    | body mass index year 1 $\mathbb{R}_{>0}$            |
|                   | depression                             | suffered from depression [0,1]                      |
| Sleep             | anxiety                                | suffered from anxiety [0,1]                         |
|                   | sleep-dy                               | hrs. of diurnal sleep                               |
|                   | sleep-ni                               | hrs. of nocturnal sleep [0,1]                       |
|                   | sleep-ti                               | tickling while sleep [0,1]                          |
|                   | sleep-mv                               | moves while sleep [0,1]                             |
|                   | sleep-dr                               | dreams while sleep [0,1]                            |
|                   | sleep-de                               | deep sleep [0,1]                                    |
|                   | sleep-re                               | remember dreams [0,1]                               |
|                   | sleep-en                               | enough sleep [0,1]                                  |
|                   | sleep-as                               | problems to fall asleep [0,1]                       |
|                   | sleep-in                               | interruptions while sleep [0,1]                     |
|                   | sleep-sn                               | snores while sleep [0,1]                            |
| Diet              | red-meat                               | consumption days/week [1-2,3-5,6-7]                 |
|                   | sweets                                 | days/week eat sweets [1-2,3-5,6-7]                  |
|                   | charcuterie                            | days/week eat charcuterie [1-2,3-5,6-7]             |
|                   | white-meat                             | days/week eat white meat [1-2,3-5,6-7]              |
|                   | fruits                                 | days/week eat fruits [1-2,3-5,6-7]                  |
|                   | eggs                                   | days/week eat eggs [1-2,3-5,6-7]                    |
|                   | dairy                                  | days/week eat dairy [1-2,3-5,6-7]                   |
|                   | legumes                                | days/week eat legumes [1-2,3-5,6-7]                 |
|                   | bread                                  | days/week eat bread [1-2,3-5,6-7]                   |
|                   | pasta                                  | days/week eat pasta [1-2,3-5,6-7]                   |
|                   | white-fish                             | days/week eat white fish [1-2,3-5,6-7]              |
| blue-fish         | days/week eat blue fish [1-2,3-5,6-7]  |                                                     |
| vegetables        | days/week eat vegetables [1-2,3-5,6-7] |                                                     |

*Continued on next page*

Table S1 – Continued from previous page

| Type                         | Name                          | Description                                                |
|------------------------------|-------------------------------|------------------------------------------------------------|
| Cardiovascular               | HBP                           | high blood pressure [0,1]                                  |
|                              | glucose                       | glucose metabolism [0,1,2]                                 |
|                              | dyslipidemia                  | dyslipidemia [0,1,2,3]                                     |
|                              | tobacco                       | smoker now or past[0,1]                                    |
|                              | heart                         | no heart problem, angina, infarct [0,1,2]                  |
|                              | arrythmia                     | No Arrhythmia, Atrial fibrillation, Arrhythmia [0,1,2]     |
|                              | thyroidism                    | hNo, hyper, hypo thyroidism [0,1,2]                        |
|                              | ictus                         | hNo, Ischaemic, haemorrhagic [0,1,2]                       |
| Quality of Life              | pain                          | today's pain[1,2,3]                                        |
|                              | happiness                     | today's happiness[1,2,3,4]                                 |
|                              | health-cmp                    | well being compared with last year[1,2,3]                  |
|                              | mem-lo-how                    | how is memory loss (slowly,suddenly, DK/DA) [1,2,3]        |
|                              | mem-lo-rec                    | difficulty retaining recent info [0,1]                     |
|                              | mem-lo-conv                   | memory loss affects remember recent conversations [0,1]    |
|                              | mem-lo-pp                     | memory loss affects remember people/places [0,1]           |
|                              | mem-lo-obj                    | memory loss affects remember objects names [0,1]           |
|                              | mem-lo-dai                    | memory loss affects daily activity [1,2,3,4,5]             |
|                              | mem-lo-obj-f                  | problems finding objects [0,1]                             |
| Engagement External World    | mem-lo-wri                    | wrote notes to cope with memory loss [1,2,3]               |
|                              | eew-sport                     | frequency doing sports [1,2,3]                             |
|                              | eew-recre                     | frequency doing recreational activities [1,2,3]            |
|                              | eew-friends                   | frequency going out friends [1,2,3]                        |
|                              | eew-travel                    | frequency travel/tourism [1,2,3]                           |
|                              | eew-ngo                       | frequency NGOs activities [1,2,3]                          |
|                              | eew-church                    | frequency church activities [1,2,3]                        |
|                              | eew-art                       | frequency art related (converts, expositions) [1,2,3]      |
|                              | eew-sport-e                   | frequency sport events activities [1,2,3]                  |
|                              | eew-music                     | frequency listens to music [1,2,3]                         |
|                              | eew-tv                        | frequency TV/radio [1,2,3]                                 |
|                              | eew-read                      | frequency read book/magazines [1,2,3]                      |
| eew-it                       | frequency Internet use[1,2,3] |                                                            |
| Physical Exercise            | phys                          | session × frequency <i>min/week</i>                        |
| Social Engagement            | rel-friends                   | frequency see friends [1..5]                               |
|                              | rel-fami                      | freq. family rel. [1..5]                                   |
|                              | rel-leis                      | freq. leisure outside [1,2,3]                              |
|                              | rel-lone                      | freq. feeling alone [1,2,3]                                |
| Traumatic Brain Injury       | tbi                           | episode(s) of TBI [0,1]                                    |
| Subjective Cognitive Decline | SCD                           | subjective cognitive decline $\mathbb{Z}_{\geq 0 \leq 10}$ |
|                              | s-attention                   | self perceived loss attention loss [0,1]                   |
|                              | s-worse-others                | feeling doing worse than others [0,1]                      |
|                              | s-attention                   | self perceived worsen memory [0,1]                         |
|                              | s-lang                        | self perceived worsen language expression [0,1]            |

### Operational definition of the subjective cognitive decline (SCD)

Throughout all the visits to The Vallecas Project, the participants completed an ordinal scale of cognitive complaints composed of four items with four points each (ranged 0-3). This scale included the following questions to be responded: 1) “How do you perceive your memory in comparison with that of others of your age?” (“3-bad”; “2-somewhat worse”; “1-somewhat better”; “0-excellent”); 2) “How do you perceive your memory today compared with your young adulthood?” (“0-better”; “1-equal”; “2-somewhat worse”; “3-much worse”); 3) “Do you perceive your memory today is worse than compared with ten years ago?”

(“0-no”; “1-a little worse”; “2-somewhat worse”; “3-much worse”); 4) “Do you perceive your memory today is worse than compared with one year ago?” (“0-no”; “1-a little worse”; “2-somewhat worse”; “3-much worse”). The sum of these items resulted in a total score of SCD ranging from 0 (no complaints at all) to 12 (maximum complaints).

Low-variance features (training-set variance lower than the 20% threshold) are removed. Feature *al3* (use of information technologies IT) is removed since it is strongly correlated with *years of schooling*, *eqm10* and *eqm83* are also removed since they are correlated with *scd* (*subjective cognitive decline*), finally educational level is removed since is strongly correlated with total number of schooling years..

## Random Forest

Whenever we build a random forest we need to tune the hyperparameters which need to be adjusted in order to optimize the desired performance metric. Hyperparameters are outside the model in the sense that are set by the modeler before training. Note the difference with model parameters which are learned during training. The hyperparameter tuning consists in K-Fold ( $K = 5$ ) cross validation, that is, we split the training set into K folds (subsets of the training set), then we iteratively fit the model  $K$  times, each time training the data on  $K - 1$  folds and evaluating on the  $K$ -th fold. To find the best hyperparameters we use a dual approach, first we use randomized search to randomly sample from the grid of hyperparameter range. The set of hyperparameters returned in the randomized search is used to inform the Grid search method run afterwards and that exhaustively searches all possible combination of hyperparameters.

The set of optimal hyperparameters obtained are shown in Table S2.

| Hyperparameter    | Value    | Description                                                                                                     |
|-------------------|----------|-----------------------------------------------------------------------------------------------------------------|
| bootstrap         | True     | Whether bootstrap samples are used when building trees. If False, the whole dataset is used to build each tree. |
| class weight      | balanced | weight associated with each class                                                                               |
| criterion         | Gini     | function to measure the quality of split                                                                        |
| max depth         | 10       | maximum depth of the tree                                                                                       |
| max features      | 2        | number of features to consider for the best split                                                               |
| min samples leaf  | 8        | minimum number of samples required to be at a leaf node                                                         |
| min samples split | 2        | minimum number of samples required to split an internal node                                                    |
| estimators        | 10000    | total number of trees in the forest                                                                             |

**Table S2.** Hyperparameters of the Random Forest Classifier using Grid Search cross validation.

Inherent in the hyperparameter tuning process is the evaluation criterion used. The evaluation criterion consists in computing scoring objects that gives us information about model performance, for example, accuracy.

For the sake of illustration, Figure S1 shows one tree out of the 100 trees built in the forest. The important features in a decision tree are located in the nodes close to the root of the tree and the unimportant ones will tend to be close to the leaves of the tree or entirely absent from the tree. Therefore, random forests allow us to get an estimate of the importance of any feature by calculating how deep in the tree the feature appears across all the trees. Specifically, feature importance is calculated as the decrease in node impurity weighted by the probability of reaching that node. The mean decrease in impurity importance of a feature is computed by measuring how effective the feature is at reducing uncertainty (classifiers) or variance (regressors) when creating decision trees within Random Forest.

## Confusion Matrix multiple metric evaluation

Figure S2 shows the confusion matrix calculated for both train and test sets. We use multiple metric evaluation and refit the estimator using the best found parameters. Thus, the scorers used are AUC, precision and accuracy. Each scorer is used to find the best parameters in the Grid Search cross validation for refitting the estimator. For each scorer the number of fits is  $k \times M$  where  $M$  is the number of folds ( $K = 5$ ) and  $M$  is the number of candidates in the set of parameters, that is, the power set of the range of parameters. For example, for the hyperparameter set showed next, there are 24 candidates  $[[1000,3,2,4], [1000,3,2,8], \dots]$ , making a total of 120 fits.

```
'nestimators':[1000, 10000], 'maxdepth':[3, 6, 10], 'minsamplesplit':[2,4], 'minsamplesleaf':[4,8], 'maxfeatures':[ 'auto'], 'classweight':['balanced']
```

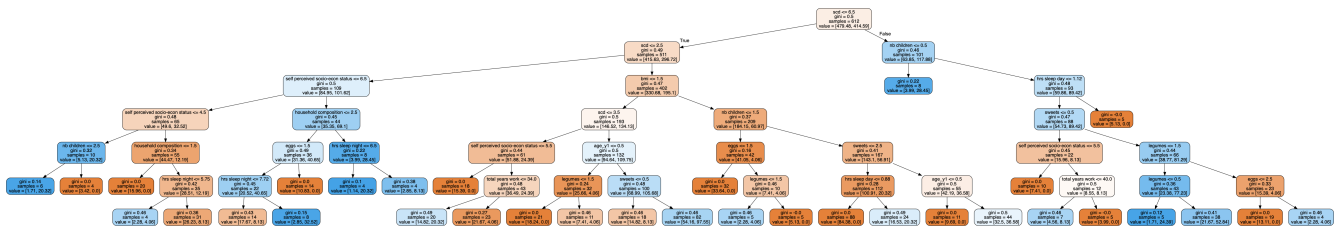

**Figure S1.** The figure shows one tree of the random forest. The root of the tree is the node with the highest Gini score, subjective cognitive decline (SCD). The nodes closer to the root are more important than those at the bottom of the tree as the Gini value included in each node indicates. The maximum depth of the tree is 6. Nodes with red color refer to samples that fall into the group of non converter to MCI, the boxes with blue color groups the converters.

$$\begin{bmatrix} 631 & 17 \\ 15 & 73 \end{bmatrix} \quad \begin{bmatrix} 153 & 9 \\ 19 & 3 \end{bmatrix}$$

**(a)** CM Accuracy scorer Train (left) and Test(right)

$$\begin{bmatrix} 551 & 29 \\ 95 & 61 \end{bmatrix} \quad \begin{bmatrix} 136 & 26 \\ 16 & 6 \end{bmatrix} \quad \begin{bmatrix} 644 & 4 \\ 2 & 86 \end{bmatrix} \quad \begin{bmatrix} 160 & 2 \\ 21 & 1 \end{bmatrix}$$

**(b)** CM Accuracy scorer Train (left) and Test(right)

**(c)** CM Accuracy scorer Train (left) and Test(right)

**Figure S2.** Confusion Matrices (CM) for multiple metric evaluation calculated both in train and test sets. From left to right: train AUC, test AUC, train precision, test precision, train accuracy, test accuracy

### Code

In the [github repository](#) is available the python the code used to generate the results is. The K-fold grid search cross validation for random forest classifier using multiple metric evaluation: AUC, precision and accuracy can be found in the repository [reports](#) directory.

### Shapley Value

The idea behind the Shapley value is that each feature value is a player in a prediction game and the game's payout is the accuracy of the prediction. For example, the prediction  $C$  for two features  $X = \{X_1, X_2\}$  according to the function  $f(X) = C$  is described in the bellow table. We want to compute the contributions of each feature for a given observation e.g.  $y=(0,1)$ .

| $X_1$ | $X_2$ | $C$ |
|-------|-------|-----|
| 0     | 0     | 0   |
| 0     | 1     | 1   |
| 1     | 0     | 1   |
| 1     | 1     | 1   |

First, we need to compute the expected prediction if no feature values are known, and from that we can compute what we need which is the prediction differences for all subsets of features  $\{\emptyset, \{1\}, \{2\}, \{1,2\}\}$

$$E[f(X_1, X_2)] = \sum_{x_1, x_2} f(x_1, x_2)P(X_1 = x_1, X_2 = x_2) = \frac{3}{4}$$

The prediction differences are then:

$$\Delta^y(\{\emptyset\}) = 0$$

$$\Delta^y(\{1\}) = E[f(X_1, X_2)|X_1 = 0] - E[f(X_1, X_2)] = \frac{0+1}{2} - \frac{3}{4} = -\frac{1}{4}$$

$$\Delta^y(\{2\}) = E[f(X_1, X_2)|X_2 = 1] - E[f(X_1, X_2)] = \frac{1+1}{2} - \frac{3}{4} = \frac{1}{4}$$

$$\Delta^y(\{1, 2\}) = E[f(X_1, X_2)|X_1 = 0, X_2 = 1] - E[f(X_1, X_2)] = \frac{1}{1} - \frac{3}{4} = -\frac{1}{4}$$

The last step is to calculate the contribution of each feature  $X_1$  and  $X_2$  using the formula of Shapley value shown in 4

$$\Phi_1 = \frac{1}{2!} [\Delta^y(\{1\}) - \Delta^y(\{\emptyset\}) + (\Delta^y(\{1, 2\}) - \Delta^y(\{2\}))] = \frac{-3}{8}$$

$$\Phi_2 = \frac{1}{2!} [\Delta^y(\{1, 2\}) - \Delta^y(\{1\}) + (\Delta^y(\{2\}) - \Delta^y(\{\emptyset\}))] = \frac{1}{8}$$

Feature  $X_2$  has a positive influence because it made the model predict 1, feature  $X_1$ , on the other hand has a negative contribution because it made less probable to predict 1. Also, feature  $X_1$  is larger in absolute value and therefore is more important for the prediction than  $X_2$ . To summarize, the Shapley values  $\Phi_1$  and  $\Phi_2$  tells us that the model was influenced by both features for the prediction of the instance (0,1), with  $X_1$  being more important than  $X_2$ , being  $X_1$  against and  $X_2$  in favor of the decision.

## Oversampling of minority class

A dataset is said to be imbalanced if the classes are not approximately equally represented. The imbalance of this dataset is on the order of 10 to 1. Predictive accuracy is not appropriate when the dataset is imbalanced. For example a predictor that always predicts the majority class in a 100 to 1 imbalance will have a 99% accuracy.

One way to address this problem is over-sampling the minority class in order to create enough synthetic examples to balance the dataset. We use the Synthetic Minority Oversampling Technique (SMOTE)<sup>88</sup>, the algorithm resamples the minority class (converters) to get a newly balanced dataset. The number of nearest neighbors used to construct the synthetic samples is set to the default value in the algorithm<sup>90</sup>.

Figure S3 shows the learning curve for the new dataset including the synthetic cases. The learning curve shows the training score superior to the validation score with the latter increasing as we add more examples. Overall, the learning curve suggests that adding more training samples will most likely increase generalization.

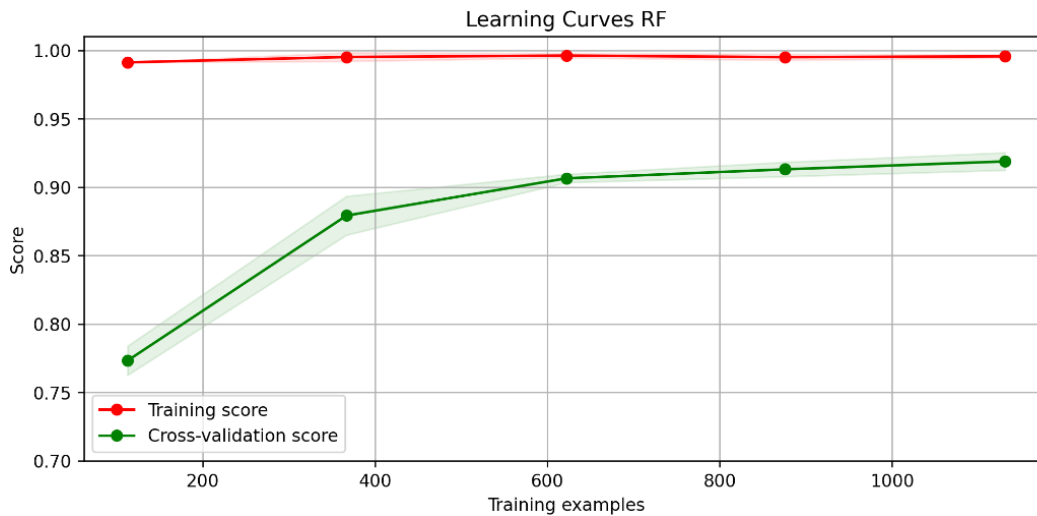

**Figure S3.** The figure shows the learning curve which includes the validation and training score of the random forest estimator for varying numbers of training samples. In red the training score and in green the validation score. The curves shows that the gap between scores could eventually get closer as more data points are added.
